# Supplementary material for: NORFA, long intergenic noncoding RNA, maintains sow fertility by inhibiting granulosa cell death
Source: PubMed Central journal article supplement (PMC7080823; doi:10.1038/s42003-020-0864-x), 2020-03-18
Supplement: 42003_2020_864_MOESM1_ESM.pdf [file 42003_2020_864_MOESM1_ESM.pdf]

## Supplementary Figures

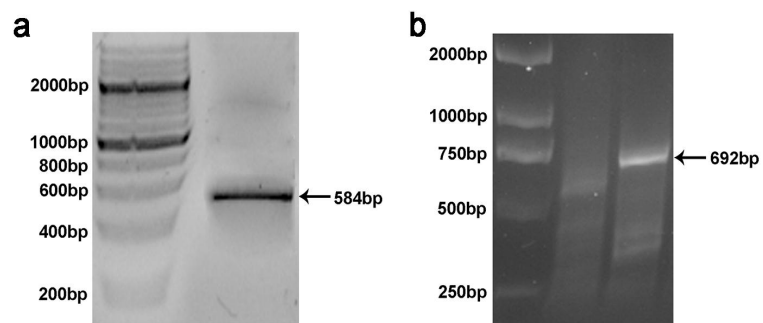

**Supplementary Figure 1. 5'- and 3'-RACE analyses for porcine lincRNA-NORFA.** Gel images showing the nested PCR amplified products obtained from 5'-RACE (**a**) and 3'-RACE (**b**) analyses. Black arrows indicate the products at 584 bp and 692 bp in length, respectively. DNA molecular weight markers are also represented.

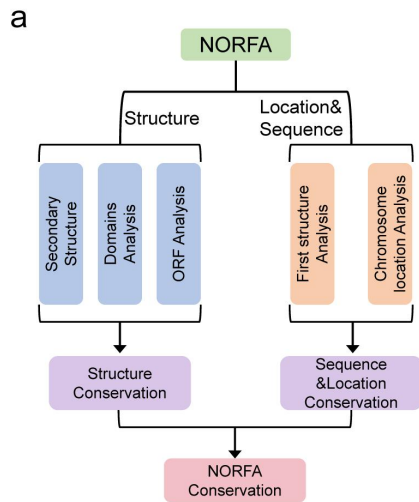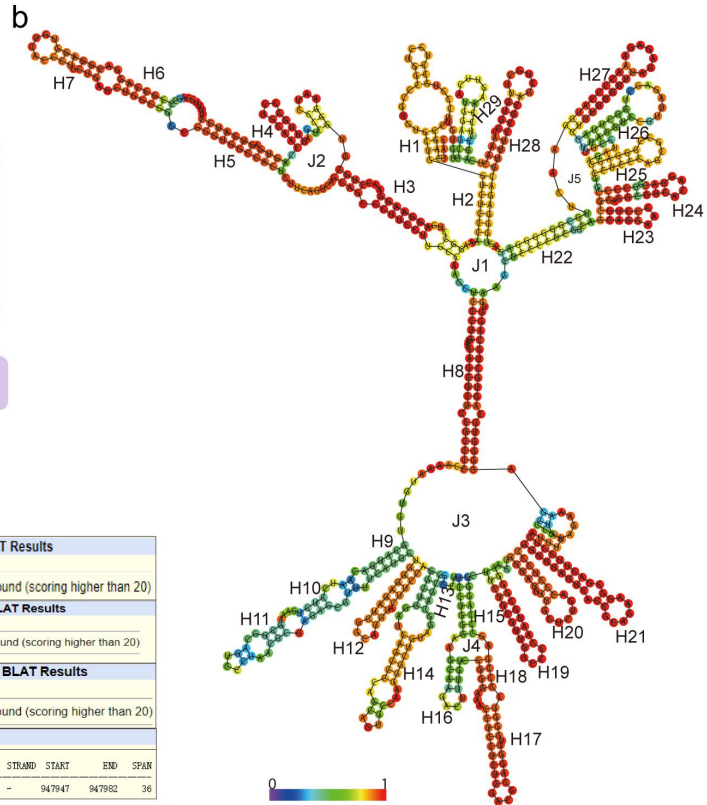

**c**

| Human (hg38) BLAT Results                        |         | Mouse (mm10) BLAT Results                        |       |     |       |          |                      |        |        |        |      |
|--------------------------------------------------|---------|--------------------------------------------------|-------|-----|-------|----------|----------------------|--------|--------|--------|------|
| Sorry, no matches found (scoring higher than 20) |         | Sorry, no matches found (scoring higher than 20) |       |     |       |          |                      |        |        |        |      |
| Chimp (panTro6) BLAT Results                     |         | Sheep (oviAri4) BLAT Results                     |       |     |       |          |                      |        |        |        |      |
| Sorry, no matches found (scoring higher than 20) |         | Sorry, no matches found (scoring higher than 20) |       |     |       |          |                      |        |        |        |      |
| Cow (bosTau9) BLAT Results                       |         | Chicken (galGal6) BLAT Results                   |       |     |       |          |                      |        |        |        |      |
| Sorry, no matches found (scoring higher than 20) |         | Sorry, no matches found (scoring higher than 20) |       |     |       |          |                      |        |        |        |      |
| Pig (susScr11) BLAT Results                      |         |                                                  |       |     |       |          |                      |        |        |        |      |
| ACTIONS                                          | QUERY   | SCORE                                            | START | END | QSIZE | IDENTITY | CHROM                | STRAND | START  | END    | SPAN |
| <a href="#">browser details</a>                  | YourSeq | 36                                               | 1     | 36  | 36    | 100.0%   | chrUn_NW_018084833v1 | -      | 947947 | 947982 | 36   |

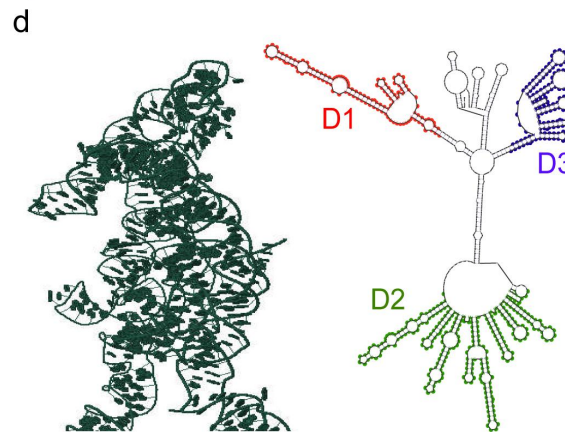

**D1 domain**  
Human (hg38) BLAT Results

| ACTIONS                         | QUERY | SCORE | START | END | QSIZE | IDENTITY | CHROM | STRAND | START    | END      | SPAN |
|---------------------------------|-------|-------|-------|-----|-------|----------|-------|--------|----------|----------|------|
| <a href="#">browser details</a> | NORFA | 20    | 98    | 117 | 148   | 100.0%   | chr17 | +      | 10198866 | 10198885 | 20   |

**D2 domain**  
Human (hg38) BLAT Results

| ACTIONS                         | QUERY | SCORE | START | END | QSIZE | IDENTITY | CHROM | STRAND | START     | END       | SPAN |
|---------------------------------|-------|-------|-------|-----|-------|----------|-------|--------|-----------|-----------|------|
| <a href="#">browser details</a> | NORFA | 33    | 124   | 290 | 292   | 62.2%    | chr2  | +      | 206600434 | 206603051 | 108  |
| <a href="#">browser details</a> | NORFA | 22    | 121   | 143 | 292   | 100.0%   | chr20 | +      | 51270275  | 51270301  | 27   |
| <a href="#">browser details</a> | NORFA | 20    | 122   | 141 | 292   | 100.0%   | chr4  | -      | 168879999 | 168880018 | 20   |

**D3 domain**  
Human (hg38) BLAT Results

| ACTIONS                         | QUERY | SCORE | START | END | QSIZE | IDENTITY | CHROM | STRAND | START     | END       | SPAN |
|---------------------------------|-------|-------|-------|-----|-------|----------|-------|--------|-----------|-----------|------|
| <a href="#">browser details</a> | NORFA | 29    | 19    | 56  | 116   | 94.2%    | chr3  | +      | 181696143 | 181696188 | 46   |

**e**

**ORF Finder results**  
Results for 739 residue sequence "NORFA" starting "CATCAGCCTC"  
No ORFs were found in reading frame 1.

**ORF Finder results**  
Results for 739 residue sequence "NORFA" starting "CATCAGCCTC"  
>ORF number 1 in reading frame 1 on the reverse strand extends from base 82 to base 249  
ATGGGGTTCCTCTTACAGCCACAGCTAAGCCAGCTTAAAGCCAAAGCGATCTCC  
CCCGCGCTCGAGGCCGGGGCCCTCTGTGACGCTCCCGACGGTTCCTGCTGCCAGG  
GGAGCTTCACTCGACCACTCCACCTCTTCTTCAGGTAATAATGA  
>Translation of ORF number 1 in reading frame 1 on the reverse strand.  
MGFLSNPTAKPALDLINGSPPGAGRPFPSCDASAGFLLRGASPALHPSFVRK\*

**All Genomes BLAT Results**

| Name  | Genome             | Assembly | Tiles | Chrom                |
|-------|--------------------|----------|-------|----------------------|
| NORFA | Pig                | susScr11 | 31    | chrUn_NW_018084833v1 |
| NORFA | American alligator | allMis1  | 4     | JH734654             |
| NORFA | Bison              | bisBis1  | 4     | KN264896v1           |
| NORFA | Cow                | bosTau9  | 4     | chr16                |
| NORFA | Horse              | equCab3  | 4     | chr24                |
| NORFA | Chicken            | galGal6  | 4     | chr19                |
| NORFA | Gorilla            | gorGor5  | 2     | CYUI0100003v1        |
| NORFA | Human              | hg38     | 2     | chr1                 |
| NORFA | Coelacanth         | latCha1  | 2     | JH126564             |
| NORFA | Elephant           | loxAfr3  | 2     | scaffold_0           |

**Cow (bosTau9) BLAT Results**

| ACTIONS                         | QUERY | SCORE | START | END | QSIZE | IDENTITY | CHROM | STRAND | START     | END       | SPAN |
|---------------------------------|-------|-------|-------|-----|-------|----------|-------|--------|-----------|-----------|------|
| <a href="#">browser details</a> | NORFA | 26    | 141   | 166 | 168   | 100.0%   | chr11 | -      | 105959425 | 105959450 | 26   |
| <a href="#">browser details</a> | NORFA | 23    | 129   | 154 | 168   | 96.2%    | chr11 | +      | 78399066  | 78399093  | 28   |
| <a href="#">browser details</a> | NORFA | 20    | 109   | 128 | 168   | 100.0%   | chr24 | +      | 42274447  | 42274466  | 20   |

**Chicken (galGal6) BLAT Results**

| ACTIONS                         | QUERY | SCORE | START | END | QSIZE | IDENTITY | CHROM | STRAND | START    | END      | SPAN |
|---------------------------------|-------|-------|-------|-----|-------|----------|-------|--------|----------|----------|------|
| <a href="#">browser details</a> | NORFA | 24    | 120   | 144 | 168   | 100.0%   | chr3  | +      | 57619879 | 57619906 | 28   |
| <a href="#">browser details</a> | NORFA | 23    | 119   | 146 | 168   | 96.0%    | chr14 | +      | 70800696 | 70800724 | 29   |
| <a href="#">browser details</a> | NORFA | 23    | 119   | 146 | 168   | 96.0%    | chr14 | +      | 7158650  | 7158608  | 29   |
| <a href="#">browser details</a> | NORFA | 22    | 120   | 143 | 168   | 95.9%    | chr2  | +      | 8027210  | 8027233  | 24   |
| <a href="#">browser details</a> | NORFA | 20    | 66    | 85  | 168   | 100.0%   | chr25 | -      | 1429916  | 1429935  | 20   |
| <a href="#">browser details</a> | NORFA | 20    | 127   | 146 | 168   | 100.0%   | chr1  | -      | 663655   | 663674   | 20   |

**Human (hg38) BLAT Results**

| ACTIONS                         | QUERY | SCORE | START | END | QSIZE | IDENTITY | CHROM | STRAND | START     | END       | SPAN |
|---------------------------------|-------|-------|-------|-----|-------|----------|-------|--------|-----------|-----------|------|
| <a href="#">browser details</a> | NORFA | 29    | 58    | 95  | 168   | 94.2%    | chr3  | -      | 181696143 | 181696188 | 46   |
| <a href="#">browser details</a> | NORFA | 23    | 124   | 147 | 168   | 100.0%   | chr17 | +      | 73451838  | 73451863  | 26   |
| <a href="#">browser details</a> | NORFA | 20    | 138   | 157 | 168   | 100.0%   | chr8  | -      | 18171443  | 18171462  | 20   |

f

| All Genomes BLAT Results |        |                          |       |                      |
|--------------------------|--------|--------------------------|-------|----------------------|
| Name                     | Genome | Assembly                 | Tiles | Chrom                |
| NORFA Pig                |        | <a href="#">susScr11</a> | 144   | chrUn_NW_018084833v1 |
| NORFA Cow                |        | <a href="#">bosTau9</a>  | 8     | chr11                |
| NORFA Sheep              |        | <a href="#">oviAri4</a>  | 6     | chr3                 |
| NORFA Chicken            |        | <a href="#">galGal6</a>  | 4     | chr1                 |
| NORFA Human              |        | <a href="#">hg38</a>     | 4     | chr2                 |
| NORFA Mouse              |        | <a href="#">mm10</a>     | 4     | chr16                |

**Cow (bosTau9) BLAT Results**

**BLAT Search Results**

| ACTIONS                         | QUERY | SCORE | START | END | QSIZE | IDENTITY | CHROM | STRAND | START     | END       | SPAN |
|---------------------------------|-------|-------|-------|-----|-------|----------|-------|--------|-----------|-----------|------|
| <a href="#">browser details</a> | NORFA | 56    | 50    | 718 | 739   | 49.5%    | chr11 | +      | 105958875 | 105959819 | 945  |
| <a href="#">browser details</a> | NORFA | 22    | 301   | 323 | 739   | 100.0%   | chr21 | -      | 67144106  | 67144134  | 29   |
| <a href="#">browser details</a> | NORFA | 21    | 313   | 333 | 739   | 100.0%   | chr17 | -      | 67110189  | 67110209  | 21   |
| <a href="#">browser details</a> | NORFA | 20    | 576   | 595 | 739   | 100.0%   | chr21 | +      | 69527059  | 69527078  | 20   |
| <a href="#">browser details</a> | NORFA | 20    | 164   | 183 | 739   | 100.0%   | chr13 | +      | 62677480  | 62677499  | 20   |
| <a href="#">browser details</a> | NORFA | 20    | 6     | 25  | 739   | 100.0%   | chr12 | +      | 35225350  | 35225369  | 20   |

**Sheep (oviAri4) BLAT Results**

**BLAT Search Results**

| ACTIONS                         | QUERY | SCORE | START | END | QSIZE | IDENTITY | CHROM | STRAND | START     | END       | SPAN |
|---------------------------------|-------|-------|-------|-----|-------|----------|-------|--------|-----------|-----------|------|
| <a href="#">browser details</a> | NORFA | 92    | 50    | 525 | 739   | 47.0%    | chr3  | -      | 812354    | 812897    | 544  |
| <a href="#">browser details</a> | NORFA | 24    | 1     | 25  | 739   | 100.0%   | chr19 | -      | 60265655  | 60266028  | 374  |
| <a href="#">browser details</a> | NORFA | 24    | 434   | 464 | 739   | 44.1%    | chr18 | +      | 56438471  | 56438497  | 27   |
| <a href="#">browser details</a> | NORFA | 23    | 189   | 216 | 739   | 88.0%    | chr14 | -      | 14071843  | 14071869  | 27   |
| <a href="#">browser details</a> | NORFA | 22    | 441   | 466 | 739   | 92.4%    | chr20 | +      | 14229295  | 14229320  | 26   |
| <a href="#">browser details</a> | NORFA | 22    | 2     | 24  | 739   | 100.0%   | chr2  | +      | 229784821 | 229784846 | 26   |
| <a href="#">browser details</a> | NORFA | 20    | 191   | 210 | 739   | 100.0%   | chr20 | -      | 48691001  | 48691020  | 20   |
| <a href="#">browser details</a> | NORFA | 20    | 164   | 183 | 739   | 100.0%   | chr13 | +      | 62004179  | 62004198  | 20   |

**Human (hg38) BLAT Results**

**BLAT Search Results**

| ACTIONS                         | QUERY | SCORE | START | END | QSIZE | IDENTITY | CHROM | STRAND | START    | END      | SPAN |
|---------------------------------|-------|-------|-------|-----|-------|----------|-------|--------|----------|----------|------|
| <a href="#">browser details</a> | NORFA | 27    | 31    | 58  | 739   | 100.0%   | chr17 | +      | 33333051 | 33333088 | 38   |
| <a href="#">browser details</a> | NORFA | 24    | 486   | 510 | 739   | 100.0%   | chr15 | -      | 47689554 | 47689596 | 43   |
| <a href="#">browser details</a> | NORFA | 23    | 512   | 535 | 739   | 100.0%   | chr17 | -      | 73451838 | 73451863 | 26   |
| <a href="#">browser details</a> | NORFA | 20    | 141   | 160 | 739   | 100.0%   | chr17 | +      | 10198866 | 10198885 | 20   |
| <a href="#">browser details</a> | NORFA | 20    | 35    | 56  | 739   | 95.5%    | chr11 | +      | 40930981 | 40931002 | 22   |

**Mouse (mm10) BLAT Results**

**BLAT Search Results**

| ACTIONS                         | QUERY | SCORE | START | END | QSIZE | IDENTITY | CHROM | STRAND | START    | END      | SPAN |
|---------------------------------|-------|-------|-------|-----|-------|----------|-------|--------|----------|----------|------|
| <a href="#">browser details</a> | NORFA | 28    | 499   | 539 | 739   | 93.8%    | chr14 | +      | 11448625 | 11448672 | 48   |
| <a href="#">browser details</a> | NORFA | 25    | 504   | 539 | 739   | 81.5%    | chr17 | +      | 46612779 | 46612811 | 33   |
| <a href="#">browser details</a> | NORFA | 25    | 633   | 658 | 739   | 100.0%   | chr10 | +      | 60738891 | 60738922 | 32   |
| <a href="#">browser details</a> | NORFA | 24    | 310   | 334 | 739   | 100.0%   | chr13 | +      | 69969870 | 69969913 | 44   |
| <a href="#">browser details</a> | NORFA | 23    | 359   | 382 | 739   | 100.0%   | chr12 | -      | 71995296 | 71995331 | 36   |
| <a href="#">browser details</a> | NORFA | 21    | 223   | 243 | 739   | 100.0%   | chr6  | +      | 64452496 | 64452516 | 21   |
| <a href="#">browser details</a> | NORFA | 21    | 47    | 69  | 739   | 95.7%    | chr13 | +      | 17404261 | 17404283 | 23   |

g

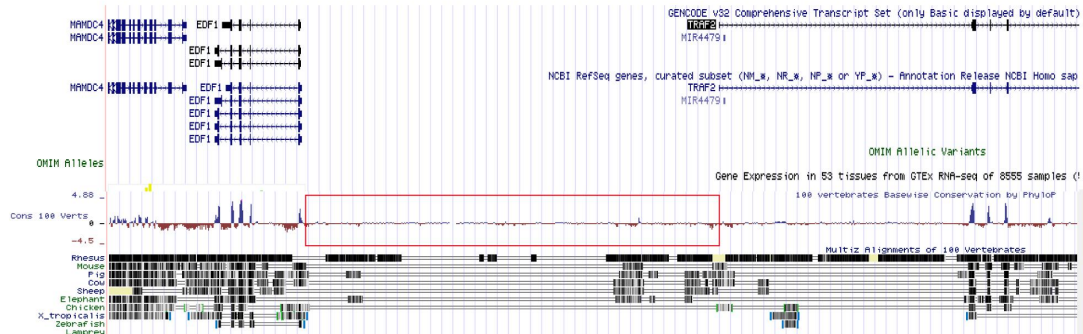

**Supplementary Figure 2. Identification of the conservation of pig NORFA structure.** (a) Diagram depicting the investigation strategy for pig NORFA conservation. (b) The secondary structure of pig NORFA was analyzed by RNAfold and RNAstructure software. H: helice, J: junction. (c) The conservation of NORFA secondary structure, diagram showing the conservation of H21 of pig NORFA by UCSC database among different species. (d) The tertiary structure and domains of pig NORFA were predicted and the conservation of these domains were detected using UCSC. (e) The potential ORFs within pig NORFA (sense and anti-sense) were predicted and their conservation were detected by UCSC. (f) The conservation of pig NORFA primary structure was detected. (g) The conservation of desert region between *EDF1* and *TRAF2* (red box) among different mammal species were detected.

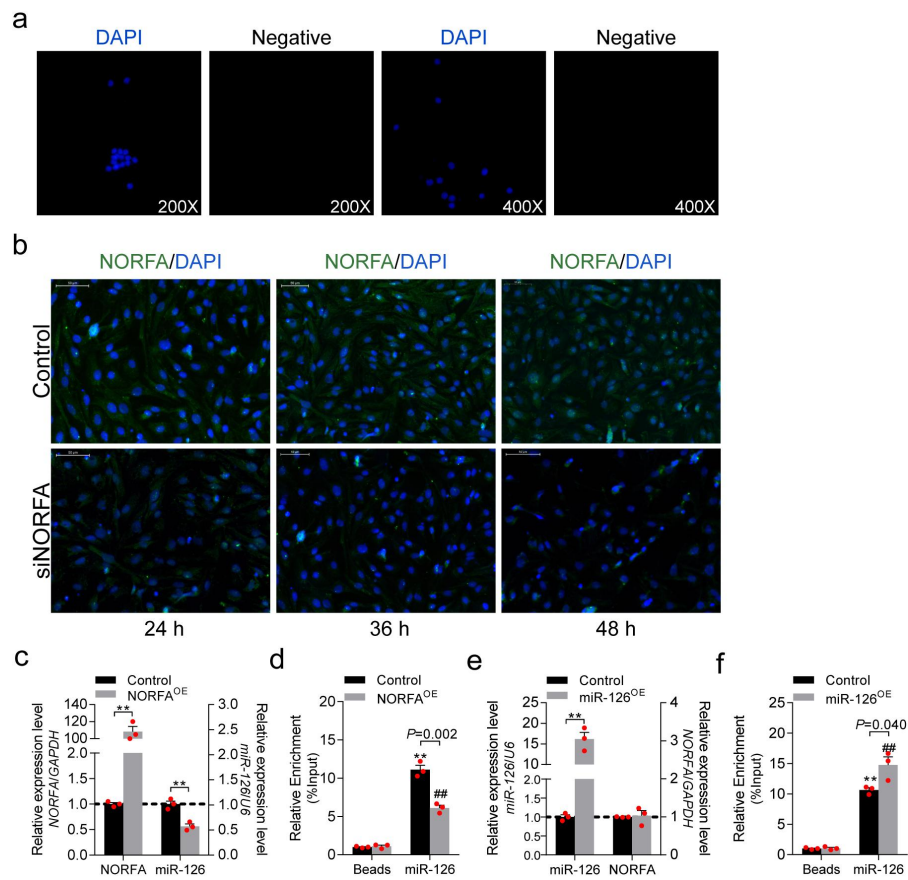

**Supplementary Figure 3. NORFA physically interacts with miR-126 in granulosa cells.** (a) The negative control for RNA FISH assays. (b) The signals of *NORFA* in porcine granulosa cells after transfection with *NORFA*-siRNA (*siNORFA*) for different time (24 h, 36 h and 48 h) were detected by FISH assays. (c) The expression levels of *NORFA* and miR-126 in *NORFA* overexpressed porcine granulosa cells were detected by qRT-PCR. (d) The enrichment of miR-126 on biotin-labeled *NORFA* in *NORFA* overexpressed porcine granulosa cells was detected by RNA pull-down. (e) The expression levels of miR-126 and *NORFA* in miR-126 overexpressed porcine granulosa cells were detected by qRT-PCR. (f) The enrichment of miR-126 on biotin-labeled *NORFA* in miR-126 overexpressed porcine granulosa cells was detected by RNA pull-down. Data in **c-f** are shown as mean  $\pm$  S.E.M. with three independent experiments. *P*-values were calculated by a two-tailed Student's *t*-test. \*\*,###*P* < 0.01.

```

Homo sapiens .....CGCTGGCCGCGGRCATTATTACTTTGGTACGGGCTGTGCACCT..TCAAACTCGTACCGTGAGTAATAATGCGCCGTCACGGCA 85
Sus scrofa .....CGCGGRCATTATTACTTTGGTACGGGCTGTGCACCT..TCAAACTCGTACCGTGAGTAATAATGCGCTCTG..... 73
Mus musculus .....CGCTGGTCTGGRCATTATTACTTTGGTACGGGCTGTGCACCT..TCAAACTCGTACCGTGAGTAATAATGCGCTCCACAGCA 86
Rattus norvegicus .....TGACRCRCATTATTACTTTGGTACGGGCTGTGCACCT..TCAAACTCGTACCGTGAGTAATAATGCGCTCA..... 73
Ornithorhynchus anatinus GAAGCATCAGIGACAGCTGGCACTCCATTATTACTTTGGTACGGGCTGTGCACCT..TCAAACTCGTACCGTGAGTAATAATGCGCTGGCAGCA 99
Bos taurus .....TGCGGRCATTATTACTTTGGTACGGGCTGTGCACCT..TCAAACTCGTACCGTGAGTAATAATGCGCTCA..... 73
Cricetulus griseus .....CGGTCCRCRCATTATTACTTTGGTACGGGCTGTGCACCT..TCAAACTCGTACCGTGAGTAATAATGCGCTCAGCAG... 80
Capra hircus .....GCTGGTCCGRCATTATTACTTTGGTACGGGCTGTGCACCT..TCAAACTCGTACCGTGAGTAATAATGCGCTCAGCAG... 82
Gallus gallus .....GCTGGTCCGRCATTATTACTTTGGTACGGGCTGTGCACCT..TCAAACTCGTACCGTGAGTAATAATGCGCTCAGCAGCA 84
Taenopygia guttata ...GAGCCATTTTAACIGCTTCCCTTCATTATTACTTTGGTACGGGCTAGCCAGAC..TCAAACTCGTACCGTGAGTAATAATGCACTCTGGCAGIGG 97
*****

```

**Supplementary Figure 4. Multiple-sequence alignment of pre-miR-126 from different species.** The multiple-sequence alignment of pre-miR-126 from 10 different species were shown and asterisks in red indicate the sequence of mature sequence of miR-126.

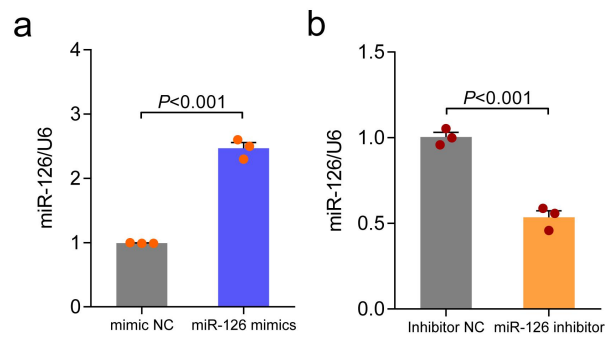

**Supplementary Figure 5. Forced expression and silencing of miR-126 in porcine granulosa cells.** (a) The expression levels of miR-126 were measured by qRT-PCR after porcine granulosa cells transfection with mimics NC (n=3) or miR-126 mimics (n=3). (b) qRT-PCR was performed and miR-126 expression levels were detected in porcine granulosa cells transfected with inhibitor NC (n=3) or miR-126 inhibitor (n=3). Data are shown as mean  $\pm$  S.E.M. by a two-tailed Student's *t*-test.

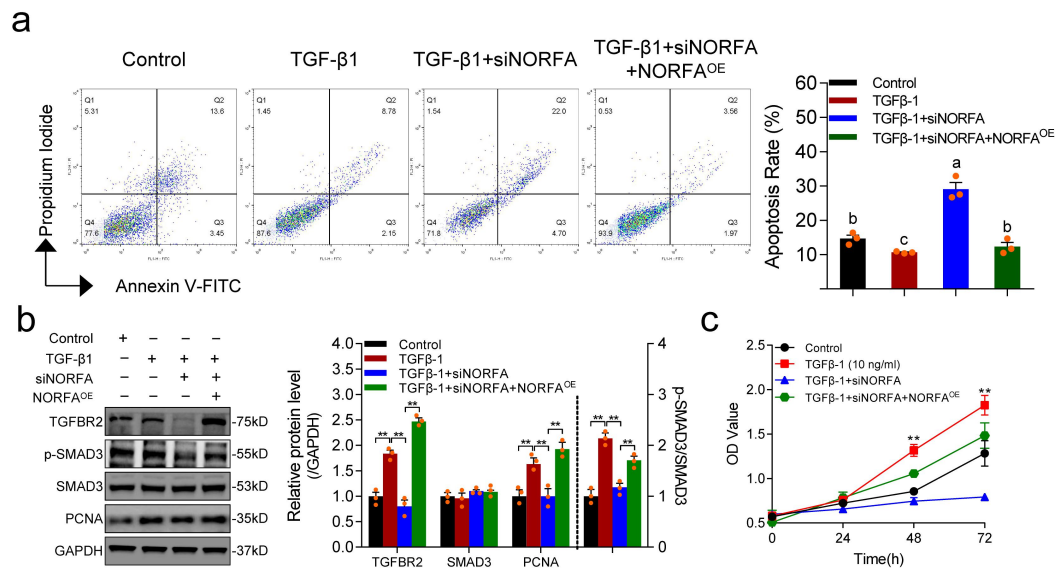

**Supplementary Figure 6. NORFA affects the sensitive of porcine granulosa cells to TGF-β1.** (a) The apoptosis rate of porcine granulosa cells treated with TGF-β1 and NORFA-siRNA (siNORFA) or/and pcDNA3.1-NORFA (NORFA<sup>OE</sup>) were measured by FACS. (b) The protein levels of TGFB2, p-SMAD3, SMAD3 and PCNA in porcine granulosa cells treated with TGF-β1 and siNORFA or/and NORFA<sup>OE</sup> were determined by western blotting and normalized to GAPDH. GAPDH was used as a loading control. (c) The proliferation levels of porcine granulosa cells treated with TGF-β1 and siNORFA or/and NORFA<sup>OE</sup> were measured by CCK-8. Data are shown as mean ± S.E.M. with three independent experiments. *P*-values were calculated by a two-tailed Student's *t*-test. \*\**P* < 0.01.

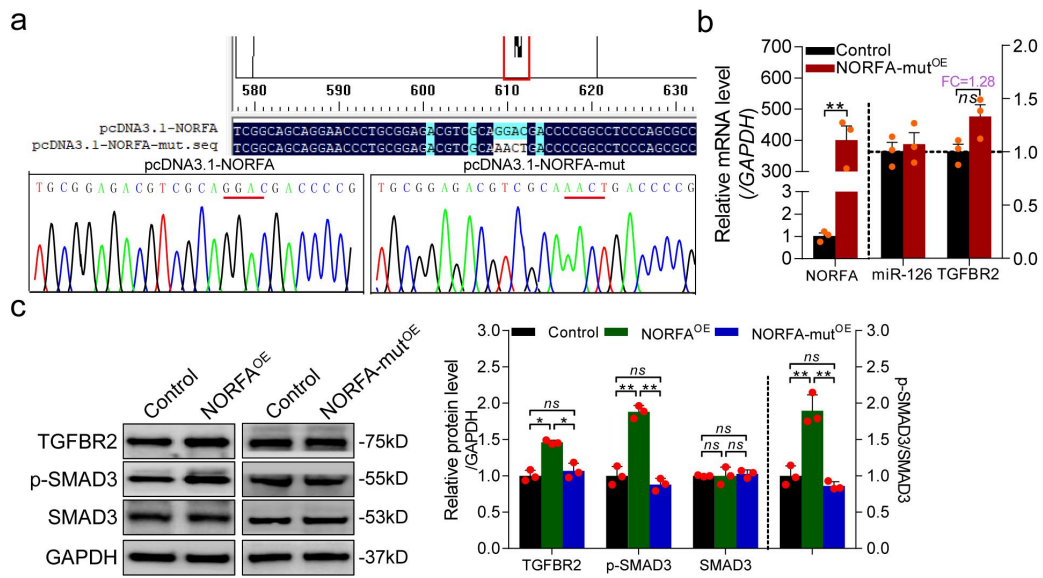

**Supplementary Figure 7. NORFA/miR-126/TGFBR2 axis regulates TGF- $\beta$  signaling pathway in granulosa cells.** (a) Construction of pcDNA3.1-NORFA-mut vector with miR-126 response element mutation. (b) The expression levels of NORFA, miR-126 and TGFBR2 in porcine granulosa cells transfected with pcDNA3.1-NORFA-mut vectors were measured by qRT-PCR. (c) The protein levels of TGFBR2 and p-SMAD3 in porcine granulosa cells treated with NORFA<sup>OE</sup> or NORFA-mut<sup>OE</sup> were detected by western blot. Data were shown as mean  $\pm$  SEM with three independent experiments. *P* values were calculated by using a two-tailed Student's *t*-test. \**P*<0.05, \*\**P*<0.01 and ns indicates no significance.



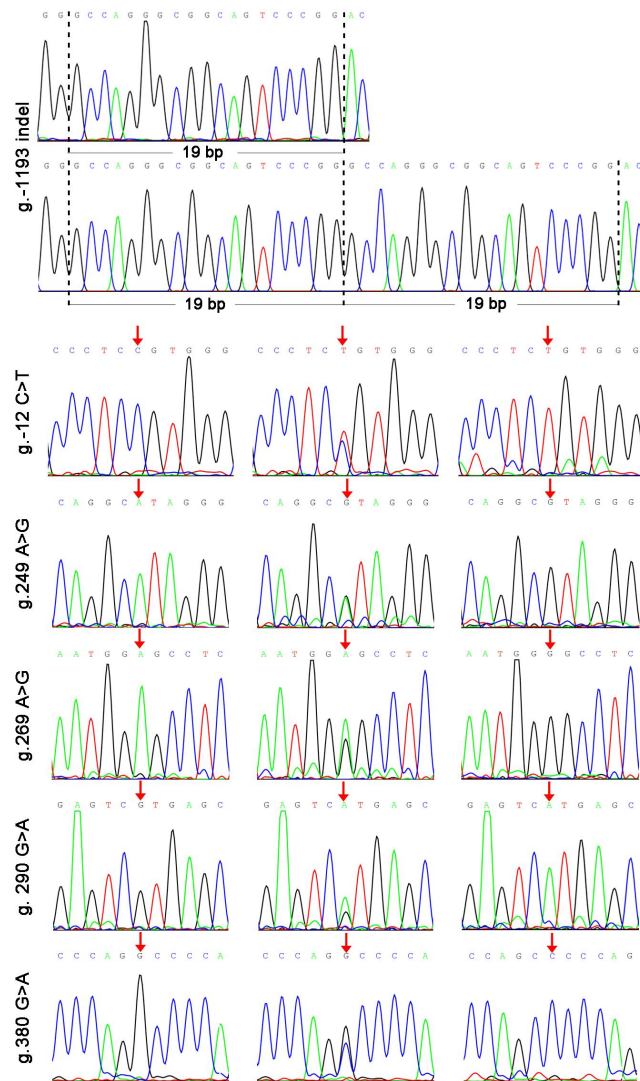

**Supplementary Figure 8. Identification of *NORFA* variants in Erhualian, Yorkshire and Landrace sow groups.** A 19-bp duplication (g.-1193 indel) and 5 point variants (g.-12C>T, g.249A>G, g.269A>G, g.290G>A and g.380G>A) were identified within *NORFA*. Sanger sequencing traces for these variants were shown and their locations were indicated by red arrows.

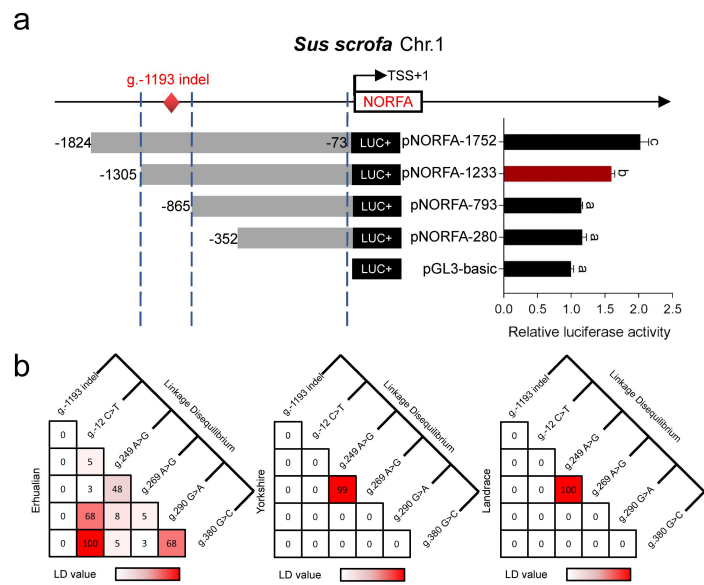

**Supplementary Figure 9. Characterization of the 19-bp duplication variant within *NORFA*.** (a) Schematic showing the luciferase reporters containing different fragments of *NORFA* 5'-flanking sequences. The core promoter of *NORFA* was identified using dual-luciferase activity assay. The transcription start site (TSS) is indicated with black arrow and the 19-bp duplication is represented with red diamond. (b) The linkage disequilibrium (LD) analyses. The LD values of these six variants within *NORFA* from Erhuanlian, Yorkshire and Landrace sow groups were calculated by SHEsis software.

**a**

>The core promoter of pig *NORFA*[-1305~-865]

```

-1305 GGGTTTGTGA GTCCAAAGCA AGGCGGCGGC GCAAAGTCCC CACGGAGACC AGGTGCGCAG
      NRF1
      NFIX
      GCCAGGGCGGCAGTCCCGG
      g.-1193 indel
-1245 CTGTCTCGGC AGGACCTCGG CCCGGAGTCG CGGGCCAGGG CGGCAGTCCC GGACGCGGCC
      MYOD1 NFIX
-1185 GGCAGGGGGC GCCTGAGGAC CCGCCAGGCT CCGCATTGGG GTGGAGGGAA CCGCGGCCCC
      CTCG E2F6
-1125 CTGCCCGGGA GCAGCACCCG GGGGACGACA CAAGCACGCA AACGGGCGCT GGGCGAGGGG
      KLF4
-1065 ACGCACCTAA CGCGGGGCCA CCCGGAGAGA GACCTTCTCC ACTCAATCTT GAGACCCTAA
      ZNF354C
-1005 AACCTGCAGA GGGCGCAGGC TGTGCCCAGC GCCTGGGGGG CAGGGAGCGG GTCTGTGTGA
-1945 GGGACTGGCG GTTGGGGTTG CAAAGGCCCT GGGGCCAGGT CAGCTGGCGA TGGGAGGCGG
      NFIC TCF3
-1885 GACGCCAGGG CGGCCCGGC

```

**b**

| TF    | del/del Location | ins/ins Location           | Score  |
|-------|------------------|----------------------------|--------|
| NFIX  | -1215/-1206      | -1234/-1225<br>-1215/-1206 | 10.687 |
| E2F6  | -1207/-1197      | -1226/-1217<br>-1207/-1197 | 6.606  |
| E2F4  | -1208/-1198      | -1228/-1217<br>-1208/-1198 | 6.584  |
| PAX2  | -1201/-1194      | -1220/-1213<br>-1201/-1194 | 5.548  |
| GABPA | -1206/-1195      | -1225/-1214<br>-1206/-1195 | 5.396  |

**Supplementary Figure 10. Characterization of the core promoter of porcine *NORFA*.** (a) The core promoter sequence of *NORFA* containing 19-bp duplication was shown. The binding motifs of the potential transcription factors (TFs) were labeled with underlines. (b) The binding motifs of TFs within 19-bp duplication alleles were analyzed by JASPAR. 5 novel binding sites for NFIX, E2F6, E2F4, PAX2 and GABPA were identified, and their locations (red) with prediction scores were represented.

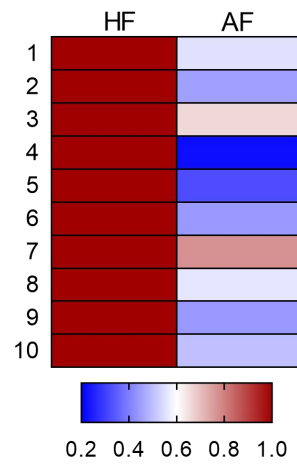

**Supplementary Figure 11. NFIX is differentially expressed during follicular atresia.** Heatmap showing the mRNA levels of NFIX in porcine granulosa cells from healthy follicles (HF) and atretic follicles (AF), analyzed by qRT-PCR (n=10). The expression levels of NFIX in AF were normalized to that in HF.

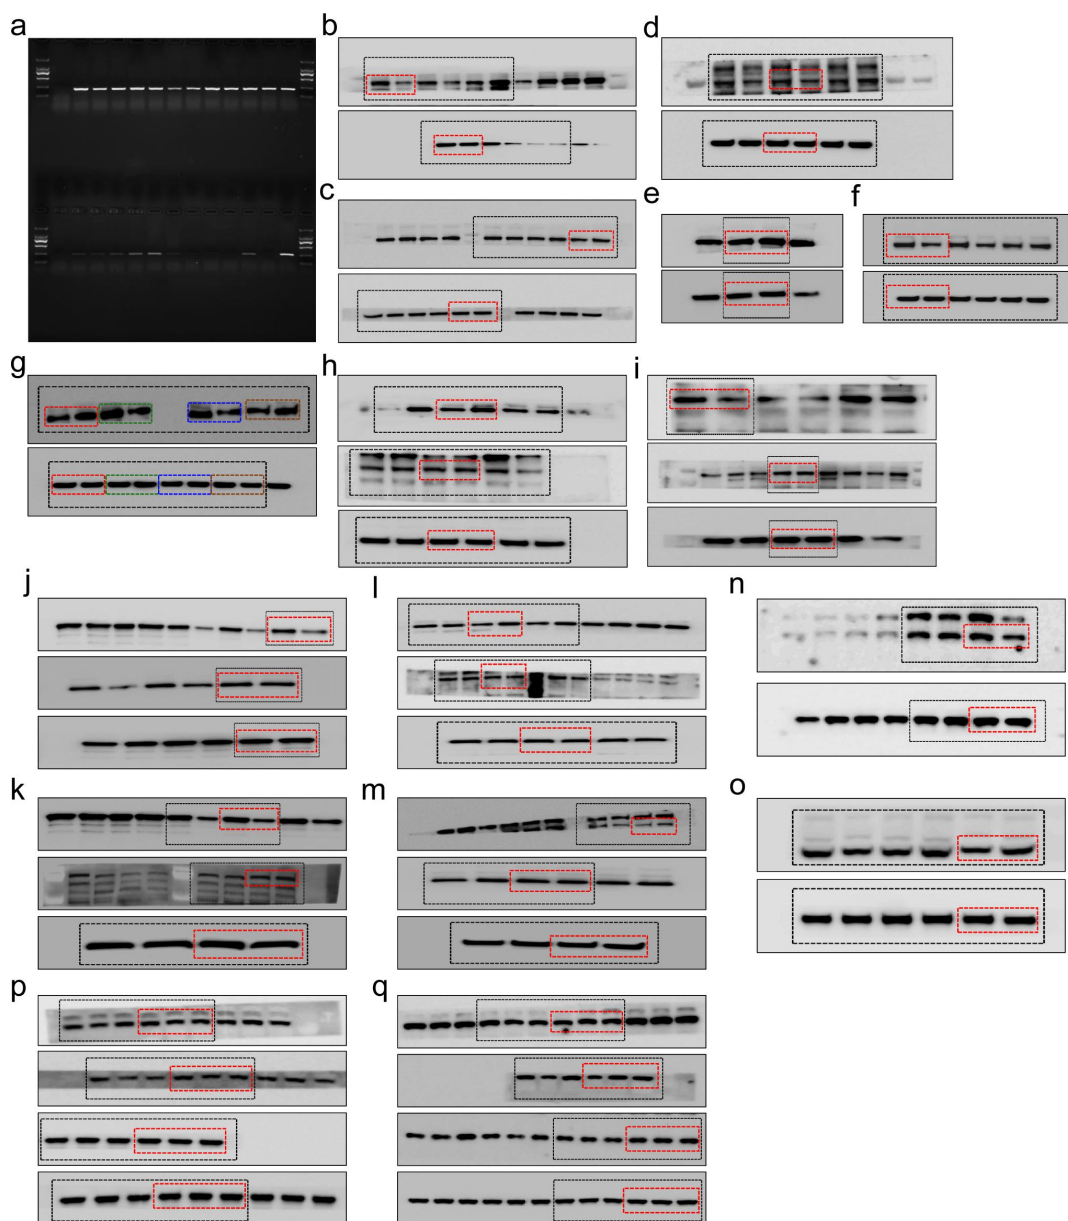

**Supplementary Figure 12. The original images of gels and blots.** (a) The original gel image for Figure1e. (b-q) The original blot images in the main figures of this manuscript. Figure6h (b), Figure6i (c), Figure7b (d), Figure7d (e), Figure7e (f), Figure8d-g (g), Figure8h (h), Figure8i (i), Figure8j (j), Figure8k (k), Figure8l (l), Figure8m (m), Figure9e (n, o), Figure10c (p) and Figure10d (q). The dotted rectangles in red, green, blue and brown indicated the representative images in the main text and the dotted rectangles in black showed the original images involved the corresponding experiments in this research.

## Supplementary Tables

**Supplementary Table 1** Oligonucleotide sequences used in this study

| <b>Name</b>       | <b>Sequence (5' to 3')</b>                                        | <b>Source</b> |
|-------------------|-------------------------------------------------------------------|---------------|
| Mimics NC         | UUGUACUACACAAAAGUACUG                                             | This study    |
| MiR-126           | UCGUACCGUGAGUAAUAAUGCG                                            | This study    |
| Inhibitor NC      | CAGUACUUUUGUGUAGUACAA                                             | This study    |
| MiR-126 inhibitor | CGCAUUUUUACUCACGGUACGA                                            | This study    |
| NC-siRNA          | Sense: UUCUCCGAACGUGUCACGUTT<br>Anti-Sense: ACGUGACACGUUCGGAGAATT | This study    |
| TGFBR2-siRNA      | Sense: GCCAACAAUCAACCACATT<br>Anti-Sense: UGUGGUUGAUGUUGUUGGCTT   | This study    |
| NORFA-siRNA       | Sense: CAGACAGAUGUGGAUGAAUTT<br>Anti-Sense: AUUCAUCCACAUCUGUCUGTT | This study    |
| NFIX-siRNA        | Sense: CCAACCGUUUGUCAGCAUTT<br>Anti-Sense: AUGCUGACAAACCGUUGGTT   | This study    |

**Supplementary Table 2.** Primers designed for qRT-PCR

| Genes             | Primer sequence (5'-3')                                     | Usage                              |
|-------------------|-------------------------------------------------------------|------------------------------------|
| <i>miR-126</i>    | CCTGTTGTCTCCAGCCACAAAAGAGCACAAATATTCAGGAGAC<br>AACAGGCGCATT | Reverse-transcription <sup>1</sup> |
| <i>miR-126</i>    | F: CGGGCCACCACCTCCCCTGCAA<br>R: CAGCCACAAAAGAGCACAAAT       | qRT-PCR                            |
| <i>EGFL7</i>      | F: TGCCAGACAGATGTGGATGAA<br>R: TCCGCTGTTGTGGGGTTT           | qRT-PCR                            |
| <i>AGPAT2</i>     | F: CGCTCGTGCGTCATCATCT<br>R: TCCAGCACCTCCACCTTGAT           | qRT-PCR                            |
| <i>LCN12</i>      | F: CGTTTCTTTCCCGTTCTGT<br>R: CCTGAGTGATCCTCCCTGTGC          | qRT-PCR                            |
| <i>C8G</i>        | F: CGGACTACCGGAGCTTTGC<br>R: AGCGTCGCAGAAGCCGTAC            | qRT-PCR                            |
| <i>FBXW5</i>      | F: CCAGAATCTCAACGCCAGCAC<br>R: TGCCGCCCAGGTCAAAGA           | qRT-PCR                            |
| <i>TRAF2</i>      | F: AGCCCTTCTCGGCCAGA<br>R: GTTCAGCACGCAGACGATGT             | qRT-PCR                            |
| <i>EDF1</i>       | F: CGAGCACTACAGTGGCGACTCAGAT<br>R: GCTCCACTATGCTGGACAGGCAGT | qRT-PCR                            |
| <i>MAMDC4</i>     | F: ACCGTTCCGGATGAGGACACA<br>R: GACCCATGCAGATAGTGATAGAAGA    | qRT-PCR                            |
| <i>PHPT1</i>      | F: CCACGGGATTGGTCACAGA<br>R: ACGGCGTGTA CTGAATCAG           | qRT-PCR                            |
| <i>LCN8</i>       | F: CGAGCAATACGCCATCCTG<br>R: CCGTGTCTGCCGTC AACTC           | qRT-PCR                            |
| <i>LCN5</i>       | F: CTGGTACGAGATCGCCTTGG<br>R: ACGATGGCGTAGGTCCTGTA          | qRT-PCR                            |
| <i>LCN6</i>       | F: GACCGCCCTTCTGGCTTTG<br>R: GATGGTTCTGCGGCGTGAG            | qRT-PCR                            |
| <i>LCN10</i>      | F: TGTCAGGCGGCTCTGTGCTT<br>R: CTGAAGAGCAGCAGCGTCTTG         | qRT-PCR                            |
| <i>FAM69B</i>     | F: TTCCGCAAAGGCATCATCTCA<br>R: TGCCCTGCCAGAGCCCACT          | qRT-PCR                            |
| <i>TMEM141</i>    | F: ATCAGGCTGTCTCACGCTCTT<br>R: CCGTCGCCTGTGATTGGTAG         | qRT-PCR                            |
| <i>CCDC183</i>    | F: CCAAGAACAAGGCGACGAT<br>R: ACGCGGTCTGAAGACGTA CTT         | qRT-PCR                            |
| <i>BAX</i>        | F: CCGAAATGTTTGCTGACG<br>R: AGCCGATCTCGAAGGAAGT             | qRT-PCR                            |
| <i>BCL2</i>       | F: TTCTTTGAGTTCGGTGGGG<br>R: CCAGGAGAAATCAAATAGAGGC         | qRT-PCR                            |
| <i>TGFBR2</i>     | F: GTGCCAAGCAGGTCATTCA<br>R: CTCCTCAGGGCTTCGGTCA            | qRT-PCR                            |
| <i>GAPDH</i>      | F: GATGGTGAAGGTCGGAGTG<br>R: CGAAGTTGTCATGGATGACC           | qRT-PCR                            |
| <i>U6</i>         | F: TTATGGGTCCTAGCCTGAC<br>R: CACTATTGCGGGTCTGC              | qRT-PCR                            |
| <i>Linc-NORFA</i> | F: AGGAACCTGCGTGGGAATC<br>R: CCGATCTCCAGCATGAAA             | qRT-PCR                            |
| <i>Rplp0</i>      | F: TCCAGGCTTAGGCATCACC<br>R: GGCTCCCACTTTGTCTCCAG           | qRT-PCR                            |
| <i>NFIX</i>       | F: CGAGGAGCGAGCGGTGAA<br>R: TGGCGAAGGCAGTCAATCC             | qRT-PCR                            |

<sup>1</sup>. Stem-loop reverse-transcriptional primers designed for detect the expression level of mature miRNAs.  
F: Forward primers; R: Reverse primers.

**Supplementary Table 3. Primers used for plasmids construction**

| <b>Plasmids</b> | <b>Primer sequence (5'-3')</b>               | <b>Vector</b>     | <b>Usage</b> |
|-----------------|----------------------------------------------|-------------------|--------------|
| NORFA-MRE-wt    | F: CCTGGGAAGCAAGACTTTGTC                     | <i>pmirGLO</i>    | vector       |
|                 | R: GGAGGCTGAGTTGCCACA                        |                   | construction |
| NORFA-MRE1-mut  | F: AAAATGTGTTTGGTATGAGCGCGCTGAGATTGGCAGTCC   | <i>pmirGLO</i>    | Mutation     |
|                 | R: GGGGGCGGAGCGCTGGGGACAGGGAGCTTGCCAAGG      |                   |              |
| NORFA-MRE2-mut  | F: AGGAACCTTTGGAGGTGGTGTATTGTTGCCGCCCTC      | <i>pmirGLO</i>    | Mutation     |
|                 | R: GCTGCCGAGGGGAGCTTCACCTGCAGCACTGCACCCCT    |                   |              |
| TGFBR2-MRE-wt   | F: TGACCTATAGGACTTGCTCGGA                    | <i>pmirGLO</i>    | vector       |
|                 | R: CACCTTCACTGTGTGCTAAAATT                   |                   | construction |
| TGFBR2-MRE-mut  | F: TCTCTGATGCTTCTCCGCGCGGATTGGGACCGTGCAAT    | <i>pmirGLO</i>    | Mutation     |
|                 | R: AACCCAACATGAGAGACCATCTATGACATAACTGGTCTGAA |                   |              |
| pNORFA-1752     | F: CGGGGTACCGGTCGTCATGGAATATGCTCG            | <i>pGL3-basic</i> |              |
|                 | R: CCGCTCGAGCCTCCAATACGATCTACTTCCTG          |                   |              |
| pNORFA-1233     | F: CGGGGTACCGGTTTGTGAGTCCAAAGCAA             | <i>pGL3-basic</i> |              |
|                 | R: CCGCTCGAGCCTCCAATACGATCTACTTCCTG          |                   |              |
| pNORFA-793      | F: CGGGGTACCACCTGTAATCCTGCTGGTGAGA           | <i>pGL3-basic</i> | vector       |
|                 | R: CCGCTCGAGCCTCCAATACGATCTACTTCCTG          |                   | construction |
| pNORFA-280      | F: CGGGGTACCCAGCATCGCGTCGCTTTT               | <i>pGL3-basic</i> |              |
|                 | R: CCGCTCGAGCCTCCAATACGATCTACTTCCTG          |                   |              |
| pcDNA3.1-NFIX   | F: GCCCCCAACTCACAACCTCTG                     | <i>pcDNA3.1</i>   |              |
|                 | R: GGGGATTTTTCCACGTCTCAA                     |                   |              |

F: Forward primers; R: Reverse primers.



**Supplementary Table 4.** Primers used for CHIP assay

| <b>Primers</b> | <b>Sequence (5'-3')</b>  | <b>Temp</b> | <b>Product size</b> |
|----------------|--------------------------|-------------|---------------------|
| NORFA          | F: GCAAAGTCCCCACGGAGACCA | 62 °C       | 139 bp for A1/A1    |
|                | R: AGCCTGGCGGGTCCTCAGGC  |             | 120 bp for A2/A2    |
| SBEX           | F:CAGCAAAGGGTGGCAAGGT    | 60 °C       | 145 bp              |
|                | R:ATGCCTGTGCCACTTTCAACT  |             |                     |

**Supplementary Table 5.** Primers used for NORFA polymorphism detection

| <b>Primers</b> | <b>Sequence (5'-3')</b>                                | <b>Annealing temp</b> | <b>Product size</b> |
|----------------|--------------------------------------------------------|-----------------------|---------------------|
| NORFA-P1       | F: TGGTCCAGGAGGGCAAGC<br>R: CCCCGTTTGCGTGCTTGT         | 62 °C                 | 637 bp              |
| NORFA-P2       | F: GGGTTTGTGAGTCAAAGCAAG<br>R: GGTTTCCACGTCCCTCGGTAT   | 60 °C                 | 796 bp              |
| NORFA-P3       | F: TTCCAGAGCCTCAAAGTGA<br>R: CCTTTGGGAGACCAGCACA       | 62 °C                 | 730 bp              |
| NORFA-P4       | F: GCAGGAAGTAGATCGTATTGGG<br>R: GGGATTCCCACGCAGGT      | 62 °C                 | 630 bp              |
| NORFA-P5       | F: CGTAGGGAGCAGCTAATGGG<br>R: CCAGCTCTAACGGACCTAAACG   | 62 °C                 | 840 bp              |
| NORFA-P6       | F: CCTGGGAAGCAAGACTTTGTC<br>R: GCAGGCTTTGAAGTTCTGTGATT | 61 °C                 | 539 bp              |

## **Supplementary Methods**

### **FACS analysis**

The apoptosis rate of porcine granulosa cells were assessed by FACS, as described in the methods with Annexin V-FITC and PI dyes. For gating strategy, cells without dye label and two single dye label were respectively used to detect the FSC/SSC gates, which is shown in Reference 24. Q1 mainly includes the dead cells, Q2 includes the late apoptotic cells, Q3 mainly includes early apoptotic cells, and Q4 mainly includes healthy cells. Besides, the right part of FSC gating (Q2+Q3) was considered as positive apoptotic cells.
