# Supplementary material for: NORFA, long intergenic noncoding RNA, maintains sow fertility by inhibiting granulosa cell death
Source: PubMed Central journal article supplement (PMC7080823; doi:10.1038/s42003-020-0864-x), 2020-03-18
Supplement: 42003_2020_864_MOESM2_ESM.pdf [file 42003_2020_864_MOESM2_ESM.pdf]

## **Description of Additional Supplementary Files**

Supplementary Data 1: Source data.

All source data underlying the graphs and charts in the main figures are available in

Supplementary Data 1.
